# Supplementary material
Source: Springer Nature journal article supplement (https://www.springermedizin.de/resource/supplementary/12891_2012_1437_MOESM5_ESM.pdf/9508348)
Supplement: MOESM5 [file 9508348]

## Worker Level

```
graph TD; A[Worker Level] --> B[Job1]; A --> C[Job2]; A --> D[Jobn];
```

### Job<sub>1</sub>

Performed 5 hrs

SI = 4

TLV for HAL < AL

### Job<sub>2</sub>

Performed 2 hrs

SI = 12

TLV for HAL > AL

### Job<sub>n</sub>

Preformed 1 hr

SI = 8

TLV for HAL > TLV
